# Supplementary material for: Media temperature control: A potentially important quality control parameter in human oocyte vitrification
Source: Research Square preprint supplement (doi:10.21203/rs.3.rs-7702661/v1), 2025-10-27
Supplement: Supplementary file 2 [file c5cda0d36e9950ed2d600d7a.docx]

**Supplementary Table 1: Processes of oocyte and embryo handling, heated surface and drop temperature measurements**

|  | ICSI Rig Display Temperature  °C | ICSI Rig Surface Temperature  °C | ICSI Rig Drop Temperature  °C | Laminar Flow-1Display Temperature °C | Laminar Flow-1 Surface Temperature °C | Lamira Flow- 1 Solution Temperature °C | Laminar Flow-2 Display Temperature  °C | Laminar Flow-2 Surface Temperature  °C | Lamira Flow-2 Solution Temperature  °C |
| --- | --- | --- | --- | --- | --- | --- | --- | --- | --- |
| March 2024 | 37±0 | 37±0 | 36.95±01 | 37.13±0.08 | 36.98±0.5 | 37±0.2 | 39±0 | 38.27±0.22 | 37±0.2 |
| April 2024 | 37.01±0.3 | 37±0 | 36.87±0.1 | 37.25±0.14 | 37.14±0.22 | 37±0.2 | 39±0 | 38.34±0.25 | 37±0.2 |
| May 2024 | 37.01±0.3 | 37±0 | 36.87±0.1 | 37.25±0.14 | 37.14±0.22 | 37±0.2 | 39±0 | 38.36±0.26 | 37±0.2 |
| June 2024 | 37±0 | 37±0 | 36.84±01 | 37.2±0.28 | 36.88±0.13 | 37±0.2 | 39±0 | 38.44±0.3 | 37±0.2 |
| July 2024 | 37±0 | 37±0 | 36.88±0.1 | 37.05±0.09 | 37.14±0.11 | 37±0.2 | 39±0 | 38.51±0.1 | 37±0.2 |
| August 2024 | 37±0 | 37±0 | 36.86±0.1 | 37.2±0 | 37.47±0.17 | 37±0.2 | 39±0 | 38.81±0.05 | 37±0.2 |
| September 2024 | 37±0 | 37±0 | 36.92 ±0.1 | 37.2±0 | 37.71±0.20 | 37±0.2 | 39±0 | 38.60±0.16 | 37±0.2 |
| October 2024 | 37±0 | 37±0 | 36.8±0.1 | 37.2±0 | 37.50±0.22 | 37±0.2 | 39±0 | 38.62±0.12 | 37±0.2 |
| November 2024 | 37±0 | 37±0 | 37.03±0.3 | 37.2±0 | 37.73±0.08 | 37±0.2 | 39±0 | 38.73±0.17 | 37±0.2 |
| December 2024 | 37±0 | 37±0 | 37.03±04 | 37.2±0 | 37.73±0.36 | 37±0.2 | 39±0 | 38.52±0.18 | 37±0.2 |
| January 2025 | 37±0 | 37±0 | 36.9±01 | 37.2±0 | 37.11±0.19 | 37±0.2 | 37.08±0.14 | 38.44±0.18 | 37±0.2 |
| February 2025 | 37±0 | 37±0 | 36.9±01 | 37.2±0 | 37.53±0.08 | 37±0.2 | 38±0 | 38.27±0.07 | 37±0.2 |

**Supplementary Table 1: Processes of oocyte and embryo handling, heated surface and drop temperature measurements**

Values are presented as mean ± standard deviation

**Supplementary Table 2: Comparison of embryo morphokinetics between the uncontrolled and controlled groups.**

| **Embryo morphokinetics** | **Uncontrolled Group** | **Controlled Group** | **p-value** |
| --- | --- | --- | --- |
| tPNa | 10.35 (9.06-11.78) (n=70) | 8.70 (7.70-9.90) (n=69) | <0.001 |
| tPNf | 29.25 (24.35-33.68) (n=60) | 24.60 (22.40-26.30) (n=69) | <0.001 |
| t2 | 33.50 (28.80-37.02) (n=40) | 27.30 (25.10-28.60) (n=69) | <0.001 |
| t3 | 38.20 (35.50-42.80) (n=39) | 37.80 (34.90-40.70) (n=69) | 0.377 |
| t4 | 48.00 (43.00-52.60) (n=37) | 40.70 (37.30-44.70) (n=69) | 0.002 |
| t5 | 52.75 (48.00-59.02) (n=32) | 50.60 (46.00-56.20) (n=69) | 0.226 |
| t6 | 52.70 (48.23-62.42) (n=28) | 52.60 (48.80-59.00) (n=69) | 0.799 |
| t7 | 60.90 (52.08-75.97) (n=26) | 56.40 (51.50-63.50) (n=69) | 0.409 |
| t8 | 63.05 (53.12-86.15) (n=24) | 61.20 (54.50-69.70) (n=69) | 0.429 |
| t9+ | 71.80 (61.50-86.60) (n=23) | 71.60 (67.00-80.40) (n=69) | 1 |
| tM | 98.20 (90.60-100.50) (n=5) | 88.40 (81.20-93.40) (n=69) | 0.286 |
| tSB | 111.10 ± 16.57 (n=5) | 99.22 ± 6.34 (n=56) | 0.185 |
| tB | 122.22 ± 20.98 (n=5) | 106.63 ± 6.69 (n=56) | 0.172 |
| tEB | 123.45 (108.10-140.28) (n=4) | 110.60 (104.9-116.6) (n=54) | 0.373 |

Values are presented as median (interquartile range) or mean ± standard deviation, according to distribution. Time points are expressed in hours post-insemination. P-values reflect comparisons between groups using the Mann–Whitney U test or independent t-test, as appropriate. Abbreviations: tPNa – time of pronuclei appearance; tPNf – time of pronuclei fading; t2–t9+ – time to 2-cell to 9+ cell stage; tM – time of morula formation; tSB – time of start of blastulation; tB – time of full blastocyst formation; tEB – time of expanded blastocyst formation.

**Supplementary Table 3: Comparison of clinical and embryological outcomes between autologous and donor oocyte cycles during the study period, before and after implementation of the vitrification temperature control.**

| **March 2024-February 2025** | **March 2024-August 2024**  **Fresh Autologous Cycle** | **September 2024- February 2025**  **Fresh Autologous Cycle** | **p-value** | **Fresh Donor Oocyte Cycle**  **March 2024-August 2024** | **Fresh Donor Oocyte Cycle**  **September 2024- February 2025** | **p-value** |
| --- | --- | --- | --- | --- | --- | --- |
| **Number of Patients** | 24 | 124 |  | 47 | 42 |  |
| **Female Age (Mean±Std)** | 36.7±5.7 | 34.7±5.2 | 0.11 | 26.1±2.4 | 26.6±2.1 | 0.29 |
| **Maturation rate (%)** | 76 | 83.8 | 0.35 | 80.2 | 80.3 | 0.99 |
| **Fertilisation Rate (%)** | 76.6 | 86.5 | 0.21 | 82 | 77.5 | 0.59 |
| **Total blastulation Rate (%)** | 61.6 | 61.6 | 1 | 72.6 | 69.6 | 0.75 |
| **Usable Blastocyst Rate (%)** | 54.8 | 50.8 | 0.71 | 62.8 | 61.8 | 0.92 |
| **Euploidy rate Rate (%)** | 60.9 | 60.9 | 1 | 75 | 74.6 | 0.96 |
| **Pregnancy Total Rate (%)** | 72.7 | 84.2 | 0.17 | 80.7 | 74.4 | 0.47 |
| **Pregnacy Single Embryo Transfer Rate(%)** | 60 | 92.3 | <0.001 | 72.7 | 73.9 | 0.89 |
| **Pregnany Double Embryo Transfer Rate (%)** | 83.3 | 66.6 | 0.10 | 85 | 100 | .00089 |
| **Fresh Embryo Transfer Pregnancy Rate (%)** | 33.3 | 100 | <0.001 | 55.6 | 100 | <0.001 |
| **Frozen Embryo Transfer Pregnancy Rate (%)** | 87.5 | 82.4 | 0.54 | 90.9 | 70.6 | 0.01 |
|  |  |  |  |  |  |  |

Values are presented as means ± standard deviation or percentages, as appropriate. Statistical comparisons between own oocyte and donor oocyte cycles were performed using the independent t-test or chi-square test. P-values <0.05 were considered statistically significant.
